# Supplementary material for: A Vegetation Assessment of the Kearl Treatment Wetland following Exposure to Oil Sands Process-Affected Water
Source: MDPI journal article supplement (doi:10.3390/w14223686), 2022-11-15
Supplement: s1 [file s1]

Supplementary Materials

# An Assessment of Vegetation in the Kearl Treatment Wetland following Exposure to Oil Sands Process-Affected Water

Alexander M. Cancelli <sup>1</sup>, Andrea K. Borkenhagen <sup>2</sup> and Asfaw Bekele <sup>3</sup>

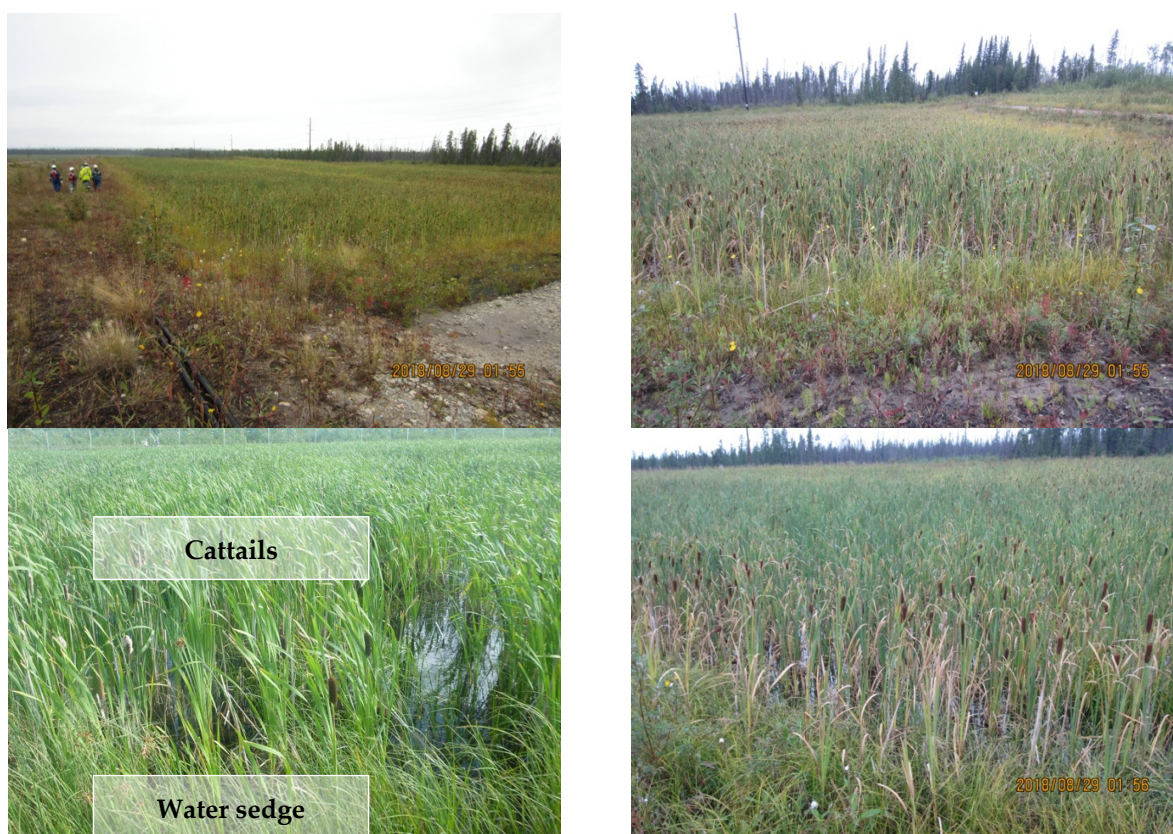

**Figure S1.** Photos of the shallow areas at the Kearl Treatment Wetland.

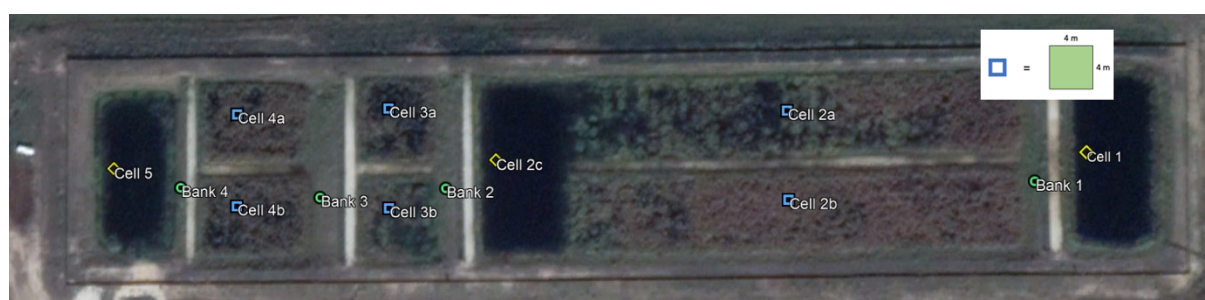

**Figure S2.** Overview of (4 × 4 m) vegetation plot locations. Plot locations in deep cells are show as yellow diamonds (Cell 1, 2c, and 5), shallow cells are show as blue squares (Cell 2a, 2b, 3a, 3b, 4a, and 4b). Source water is pumped into Cell 1 (forebay) and exits from Cell 5 (final deep cell) (Imagery date: September 9, 2019). For statistical analysis discussion, Location 2 = cell 2, Location 3 = cell 3, and Location 4 = cell 4.

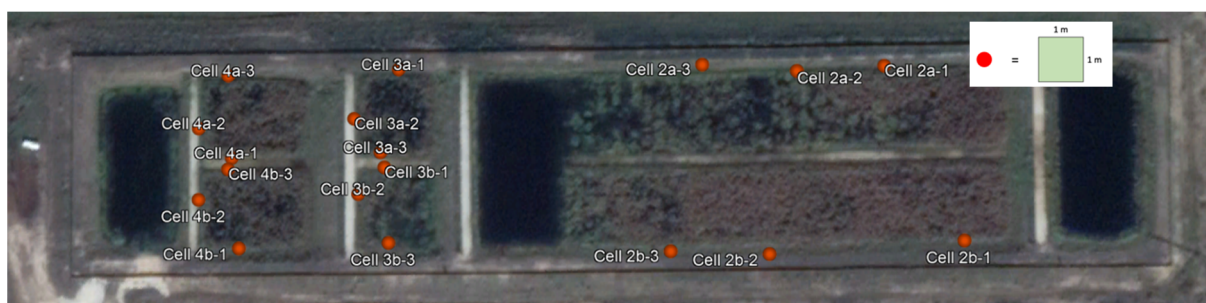

**Figure S3.** Overview of emergent plant growth (1 x 1 m) plot locations shown as red circles. Three emergent plant growth plots are located in each shallow cell (Cell 2a, 2b, 3a, 3b, 4a, and 4b), for a total of 18. For statistical analysis discussion, Location 2 = cell 2, Location 3 = cell 3, and Location 4 = cell 4.

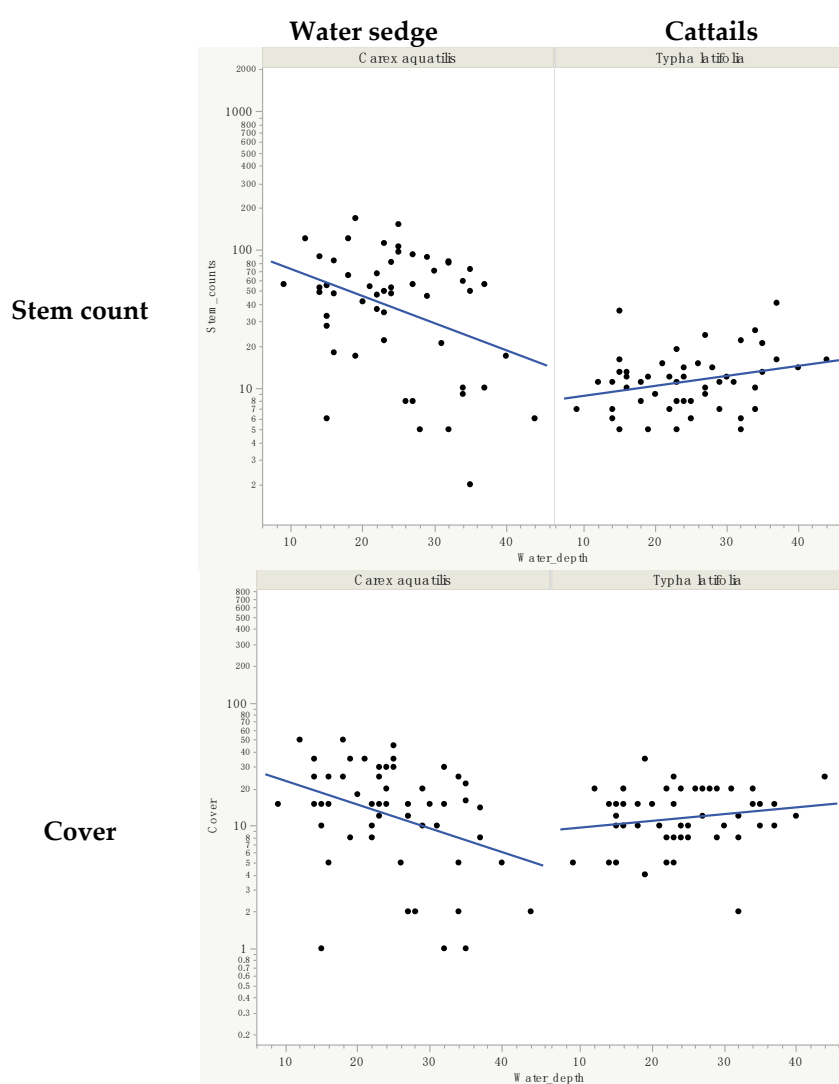

**Figure S4.** Effects of water depth on species characteristics at the Kearl Treatment Wetland, 2019-2021.

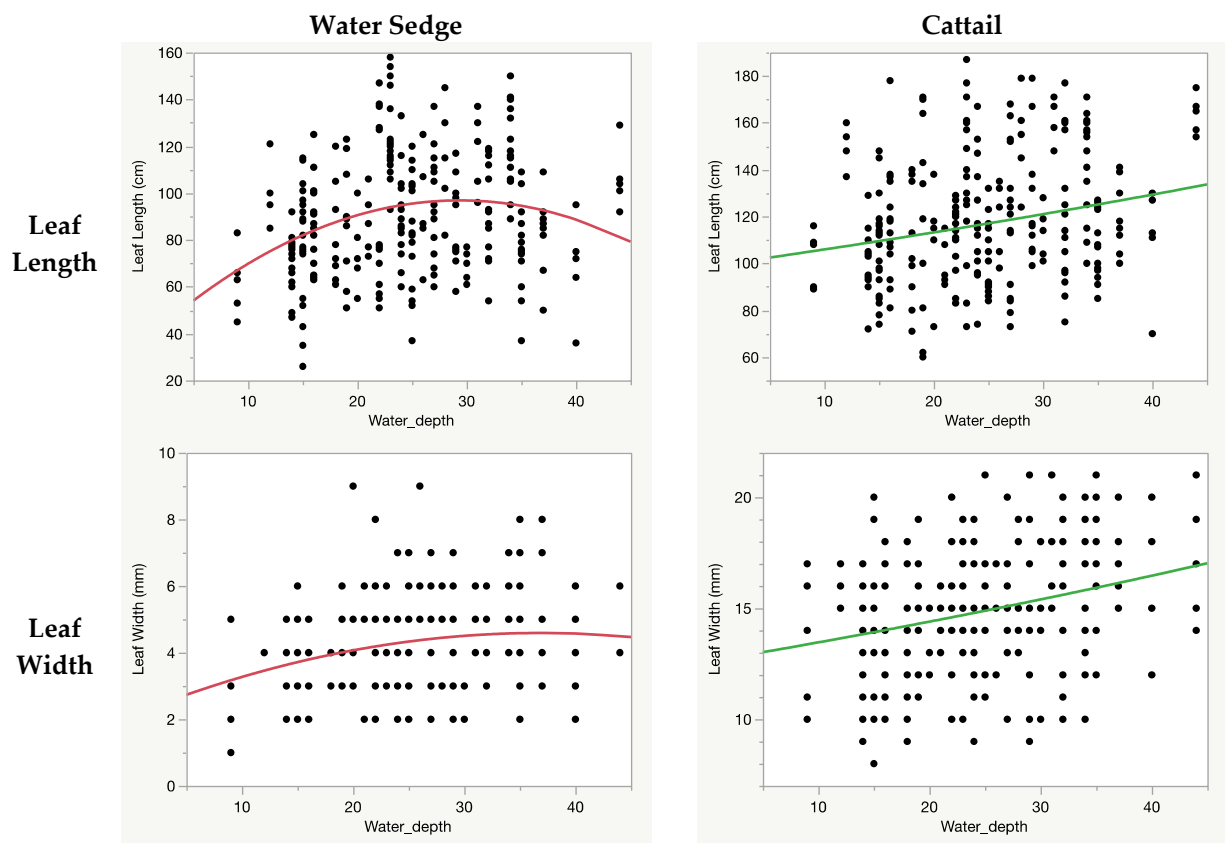

**Figure S5.** Leaf length and leaf width of water sedge and cattail vs. water depth in the Kearsy Treatment Wetland, 2019-2021.

**Table S1.** Definition of plant vigor ratings used in vegetation assessments at the KTW (ESRD, 2003).

| Rating | Description                                                                                                                                                                 |
|--------|-----------------------------------------------------------------------------------------------------------------------------------------------------------------------------|
| 0      | <i>Dead</i> – most or all plant parts are yellowed (chlorotic) or brown (necrotic) (rating ‘0’);                                                                            |
| 1      | <i>Poor</i> – plant size is stunted (small plant size) and plant parts may be up to half discoloured (chlorotic) or dead (necrotic) (rating ‘1’);                           |
| 2      | <i>Fair</i> (average) – plant species considered average for size and colour, some chlorosis, necrosis, or yellowing (up to 25%) may be present (rating ‘2’);               |
| 3      | <i>Good</i> – plant species size and colour slightly above average; minor chlorosis, necrosis, or yellowing (5 to 10%) may be present depending on season (rating ‘3’); and |
| 4      | <i>Excellent</i> – plant species above average size and colour, very minor, or no chlorosis, necrosis, or yellowing (<5%) may be present (rating ‘4’).                      |

**Table S2.** Water budget estimates from the KTW in each year of wetland operation. Total precipitation (P) and evapotranspiration (ET) was determined for the wetland based on calculations in [9].  $\Delta V = P - ET$ .

| Year | P              | ET             | $\Delta V^*$   |
|------|----------------|----------------|----------------|
|      | m <sup>3</sup> | m <sup>3</sup> | m <sup>3</sup> |
| 2016 | 1933.9         | 2256.6         | -322.7         |
| 2017 | 685.4          | 3691.2         | -3005.9        |
| 2018 | 1424.7         | 2451.4         | -1026.7        |
| 2019 | 1456.2         | 2978.0         | -1521.9        |
| 2020 | 2720.0         | 2899.0         | -179.0         |
| 2021 | 1943.1         | 3691.6         | -1748.4        |

\* $\Delta V$  does not account for water removed from the wetland or OSPW added to the wetland prior to the vegetation assessments.

**Table S3.** Plant vigor ratings in the KTW, 2016 – 2021.

| Year          | Bank      | Deep Cell | Shallow Cell | Average (std) |
|---------------|-----------|-----------|--------------|---------------|
| 2016          | 2.9 (0.2) | 2.8 (0.4) | 2.8 (0.3)    | 2.8 (0.3)     |
| 2017          | 2.8 (0.4) | 2.9 (0.5) | 3.0 (0.2)    | 2.9 (0.3)     |
| 2018          | 2.9 (0.4) | 3.0 (0.5) | 2.9 (0.3)    | 2.9 (0.4)     |
| 2019          | 2.6 (1.1) | 2.9 (1)   | 3.0 (0.2)    | 2.8 (0.7)     |
| 2020          | 3.2 (0.8) | 3.4 (0.5) | 3.5 (0.7)    | 3.4 (0.7)     |
| 2021          | 3.2 (0.5) | 3.1 (0.7) | 3.4 (0.6)    | 3.3 (0.6)     |
| Average (std) | 2.9 (0.5) | 3.0 (0.6) | 3.1 (0.4)    | 3.0 (0.5)     |

**Table S4.** Stem density, leaf length and leaf width of water sedge and cattails in the shallow cells of the KTW, 2019 – 2021.

| Plot Averages<br>(n = 3) | Stem density (stems/m <sup>2</sup> ) |                  |                  | Leaf Length (cm)    |                     |                     | Leaf Width (mm)   |                   |                   |
|--------------------------|--------------------------------------|------------------|------------------|---------------------|---------------------|---------------------|-------------------|-------------------|-------------------|
|                          | 2019                                 | 2020             | 2021             | 2019                | 2020                | 2021                | 2019              | 2020              | 2021              |
| <b>Water Sedge</b>       |                                      |                  |                  |                     |                     |                     |                   |                   |                   |
| Cell 2a                  | 50 (35.9)                            | 96 (80)          | 80 (9.2)         | 114.7 (10.4)        | 88.9 (21.1)         | 72.9 (7.6)          | 4.5 (0.9)         | 4.5 (1.5)         | 3.1 (0.7)         |
| Cell 2b                  | 24 (20.2)                            | 46 (32.7)        | 89 (21.0)        | 109.4 (14.2)        | 99.7 (27.1)         | 83.1 (21.8)         | 4.9 (1.2)         | 5.7 (1.1)         | 3.5 (1.0)         |
| Cell 3a                  | 6 (1.5)                              | 4 (2.1)          | 46 (11.7)        | 114.7 (19.4)        | 78.1 (18.1)         | 68.5 (20.8)         | 4.4 (1.3)         | 3.9 (1.1)         | 3.7 (1.2)         |
| Cell 3b                  | 27 (8.5)                             | 50 (38.2)        | 64 (22.0)        | 105.9 (13.6)        | 75.9 (19.3)         | 69.5 (12.2)         | 4.0 (0.9)         | 4.6 (2.0)         | 3.4 (0.8)         |
| Cell 4a                  | 35 (16.6)                            | 44 (19.1)        | 68 (15.0)        | 129.8 (18.1)        | 97.4 (25.0)         | 72.9 (13.2)         | 4.9 (1.2)         | 4.4 (1.1)         | 3.2 (1.0)         |
| Cell 4b                  | 96 (41.6)                            | 70 (74.1)        | 61 (17.8)        | 105.3 (12.5)        | 78.6 (25.8)         | 74.9 (17.2)         | 4.1 (1.0)         | 5.4 (1.8)         | 3.4 (1.0)         |
| <b>Average (std)</b>     | <b>40 (20.7)</b>                     | <b>52 (41.0)</b> | <b>68 (16.1)</b> | <b>113.2 (14.7)</b> | <b>86.4 (22.7)</b>  | <b>73.6 (15.5)</b>  | <b>4.5 (1.1)</b>  | <b>4.8 (1.4)</b>  | <b>3.4 (1.0)</b>  |
| <b>Cattail</b>           |                                      |                  |                  |                     |                     |                     |                   |                   |                   |
| Cell 2a                  | 7 (2.5)                              | 18 (20)          | 8 (3.2)          | 152.1 (17)          | 116.3 (35.3)        | 107.9 (11.1)        | 15.8 (3.7)        | 14.9 (3.1)        | 12.6 (2.8)        |
| Cell 2b                  | 13 (2.9)                             | 21 (7.0)         | 8 (2.5)          | 157.5 (17.2)        | 120.1 (22.1)        | 91.7 (10.2)         | 18.0 (2.5)        | 14.3 (2.2)        | 12.9 (2.3)        |
| Cell 3a                  | 11 (2.6)                             | 26 (8.4)         | 11 (3.2)         | 150.4 (18.8)        | 102.6 (17.1)        | 103.3 (15.5)        | 16.7 (2.2)        | 18.1 (2.0)        | 12.7 (2.7)        |
| Cell 3b                  | 8 (4.6)                              | 11 (2.6)         | 8 (2.6)          | 134.3 (16.5)        | 101.1 (22.9)        | 100.3 (15.2)        | 16.5 (1.4)        | 15.3 (2.7)        | 13.4 (2.4)        |
| Cell 4a                  | 12 (0.6)                             | 17 (2.1)         | 12 (2.0)         | 148.2 (24.5)        | 112.4 (22.5)        | 102.0 (13.0)        | 15.7 (1.8)        | 15.8 (2.2)        | 14.4 (2.8)        |
| Cell 4b                  | 9 (1.7)                              | 9 (8.1)          | 12 (4.5)         | 142.5 (12.9)        | 118.3 (14.2)        | 106.8 (15.3)        | 16.4 (1.8)        | 16.4 (3.0)        | 13.4 (2.2)        |
| <b>Average (std)</b>     | <b>10 (2.5)</b>                      | <b>17 (8.0)</b>  | <b>10 (8.0)</b>  | <b>147.5 (17.8)</b> | <b>111.8 (22.3)</b> | <b>102.0 (13.4)</b> | <b>16.5 (2.2)</b> | <b>15.8 (2.5)</b> | <b>13.2 (2.5)</b> |

**Table S5.** Water level (cm) in the shallow cells of the KTW, 2019 – 2021.

| Plot Averages<br>(n = 3) | Water Level (cm) |                 |               |                 |
|--------------------------|------------------|-----------------|---------------|-----------------|
|                          | 2019             | 2020            | 2021          | Average         |
| Cell 2a                  | 33 (1.2)         | 26 (9.5)        | 30 (1.5)      | 30 (4.0)        |
| Cell 2b                  | 35 (8.1)         | 32 (4.4)        | 23 (4.0)      | 30 (5.5)        |
| Cell 3a                  | 24 (5.5)         | 27 (10.8)       | 13 (3.8)      | 22 (6.7)        |
| Cell 3b                  | 18 (4.4)         | 29 (10.1)       | 14 (0.0)      | 20 (4.8)        |
| Cell 4a                  | 21 (2.1)         | 27 (8.7)        | 21 (4.2)      | 23 (5.0)        |
| Cell 4b                  | 18 (6.0)         | 29 (5.5)        | 20 (4.7)      | 22 (5.4)        |
| <b>Average (std)</b>     | <b>25 (4.5)</b>  | <b>28 (8.2)</b> | <b>20 (3)</b> | <b>25 (5.2)</b> |
