# Supplementary material for: A Vegetation Assessment of the Kearl Treatment Wetland following Exposure to Oil Sands Process-Affected Water
Source: MDPI journal article supplement (doi:10.3390/w14223686), 2022-11-15
Supplement: s1 [file s1]

Archive with 1 entries (1 files):
- water-1984731-supplementary.pdf
